# Supplementary material for: APETx4, a Novel Sea Anemone Toxin and a Modulator of the Cancer-Relevant Potassium Channel KV10.1
Source: MDPI journal article supplement (doi:10.3390/md15090287), 2017-09-13
Supplement: s1 [file s1]

SH-SY5Y - Caspase assay

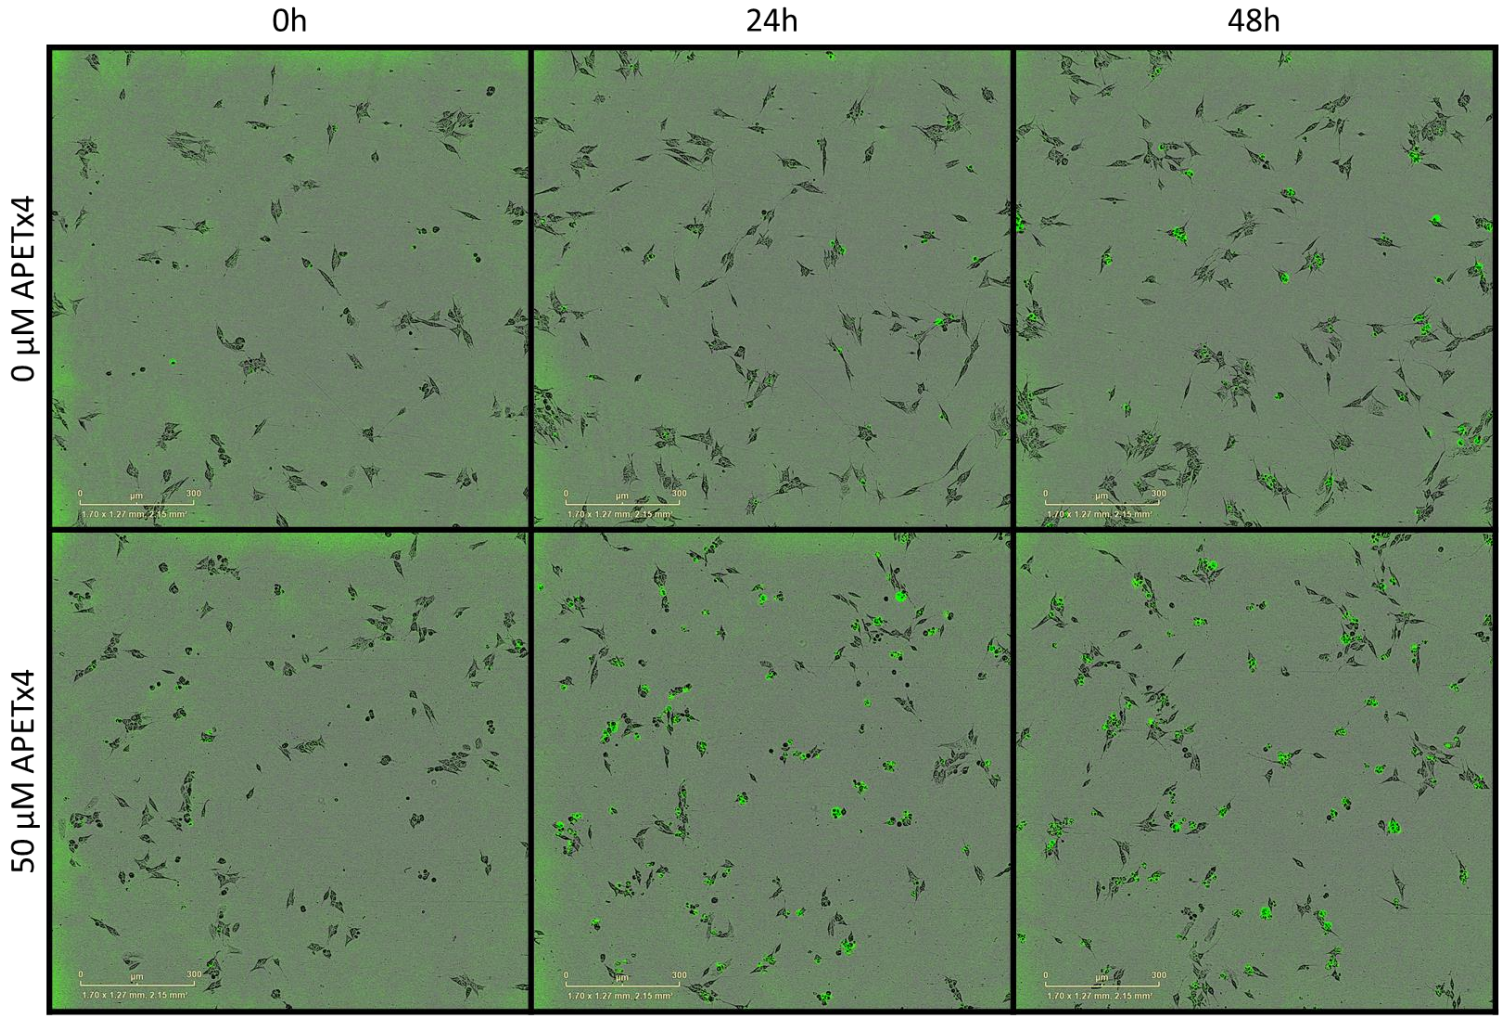



MDA-MB-435S - Caspase Assay

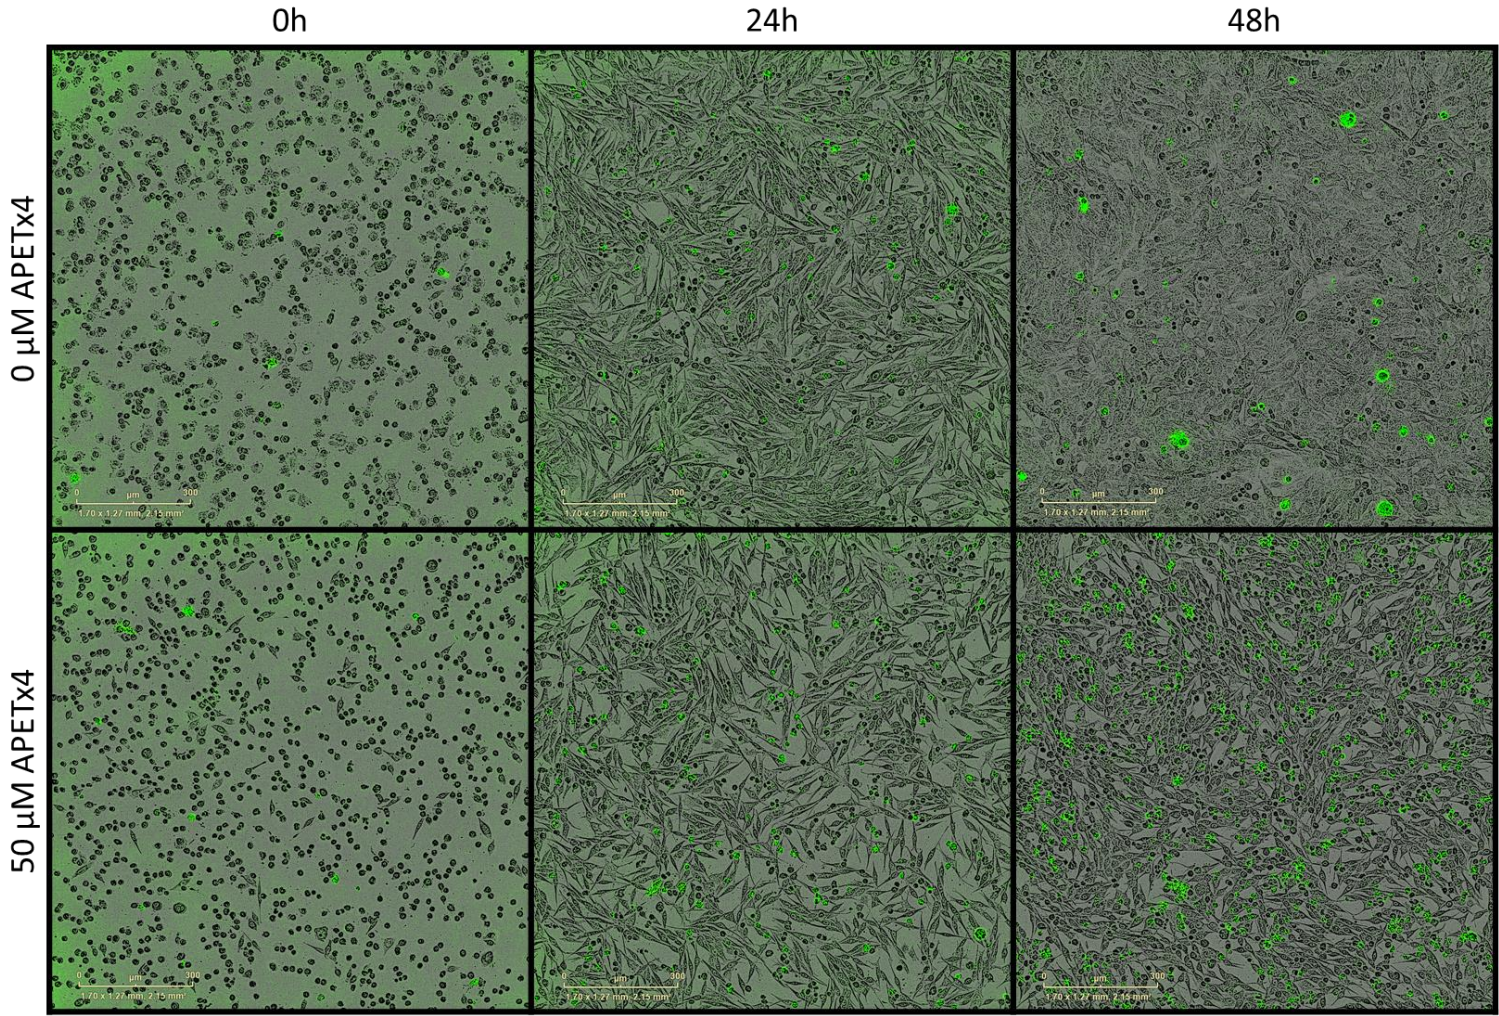



LNCAP - Caspase Assay

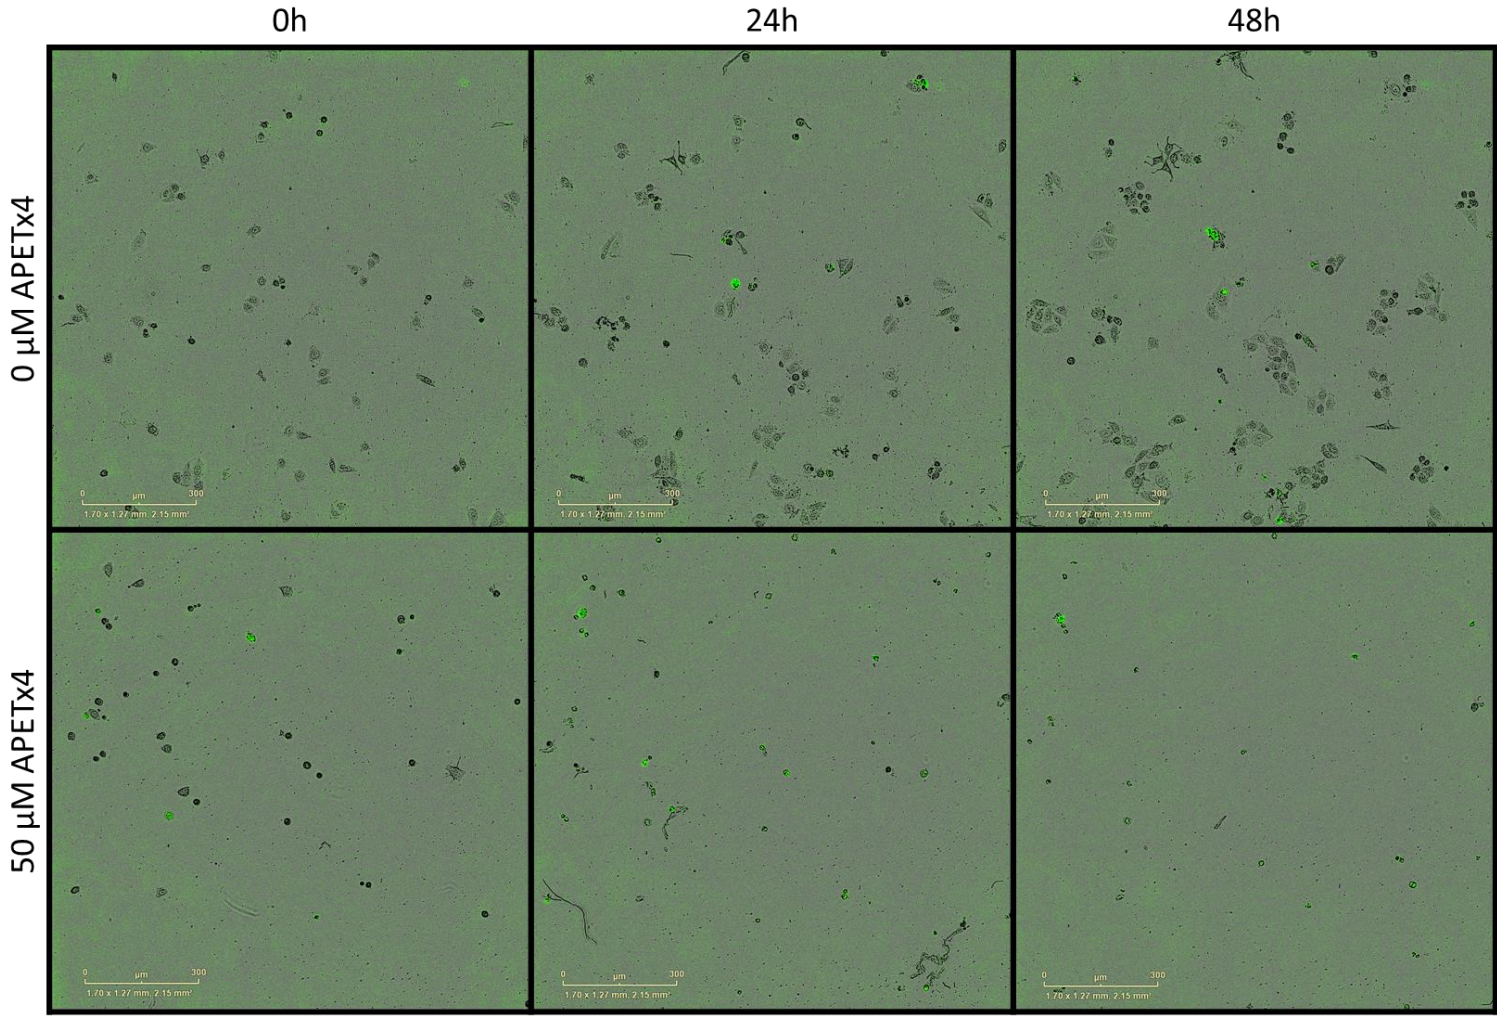

hTERT RPE-1 - Caspase Assay

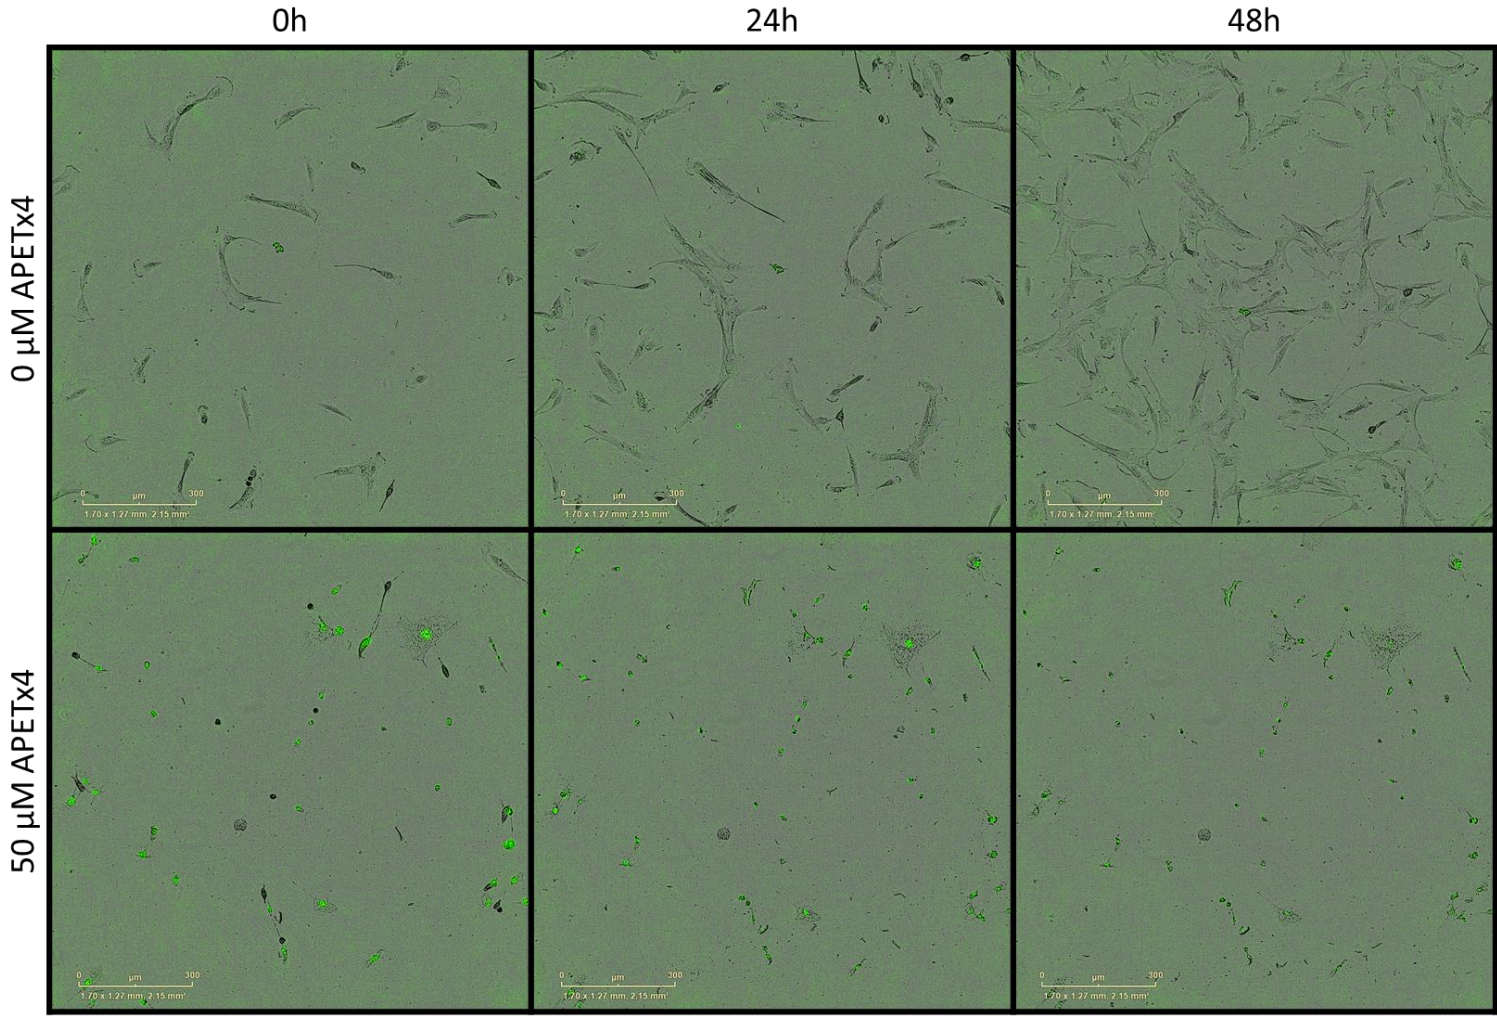



NIH-3T3 - Caspase assay

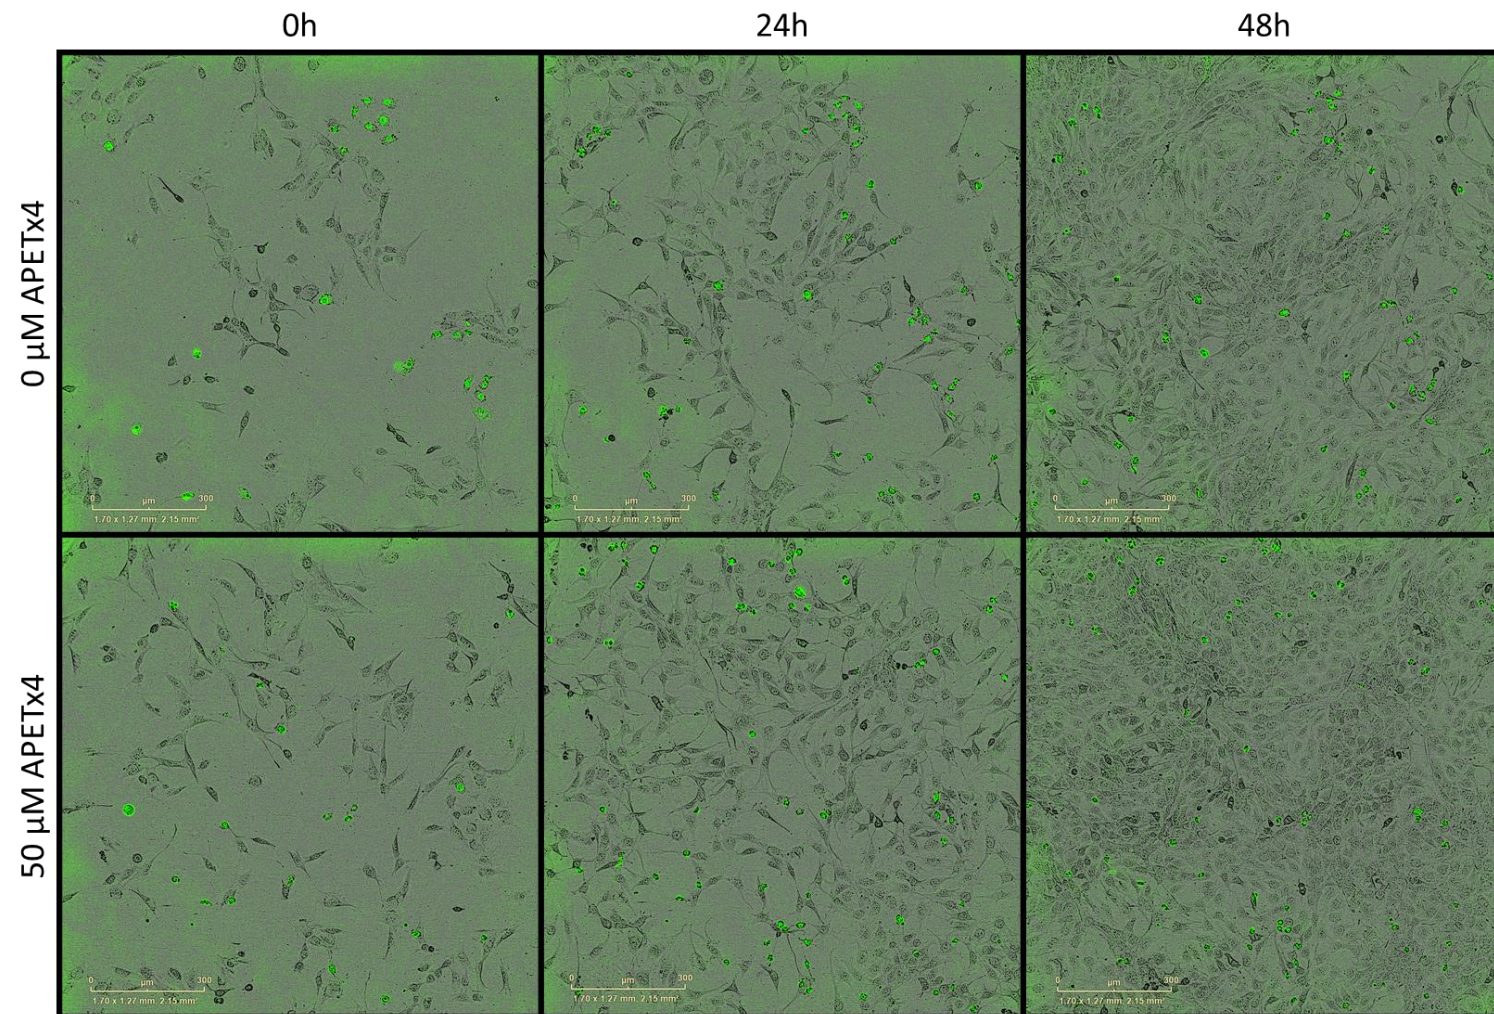

**Figure S6.** Cell images of various cell lines during apoptosis experiments. Images were taken 0h, 24h and 48 h after addition of 0 or 50  $\mu\text{M}$  APETX4.
