# Supplementary material for: APETx4, a Novel Sea Anemone Toxin and a Modulator of the Cancer-Relevant Potassium Channel KV10.1
Source: MDPI journal article supplement (doi:10.3390/md15090287), 2017-09-13
Supplement: s1 [file s1]

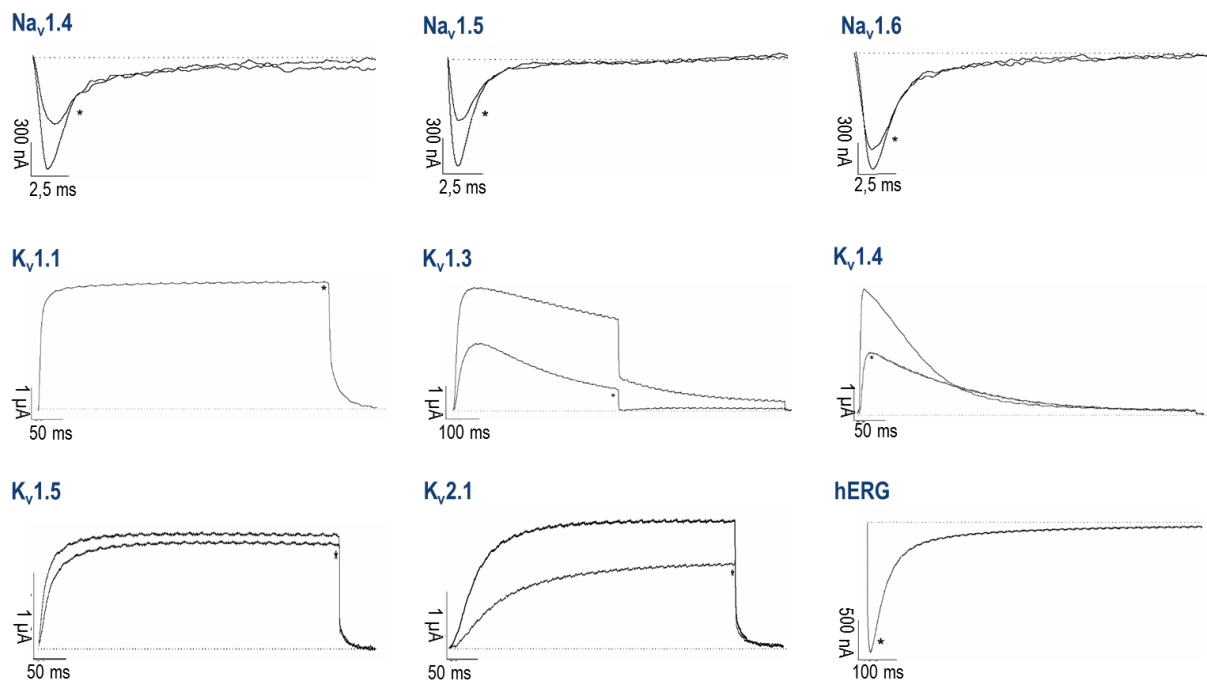

**Figure S4.** Selectivity screening on a panel of Nav and Kv channels. Representative whole-cell current traces in control and toxin conditions (\*) are shown. The traces in toxin condition are representative steady-state traces after application of 1.6  $\mu\text{M}$  toxin.
