# Supplementary material for: APETx4, a Novel Sea Anemone Toxin and a Modulator of the Cancer-Relevant Potassium Channel KV10.1
Source: MDPI journal article supplement (doi:10.3390/md15090287), 2017-09-13
Supplement: s1 [file s1]

A

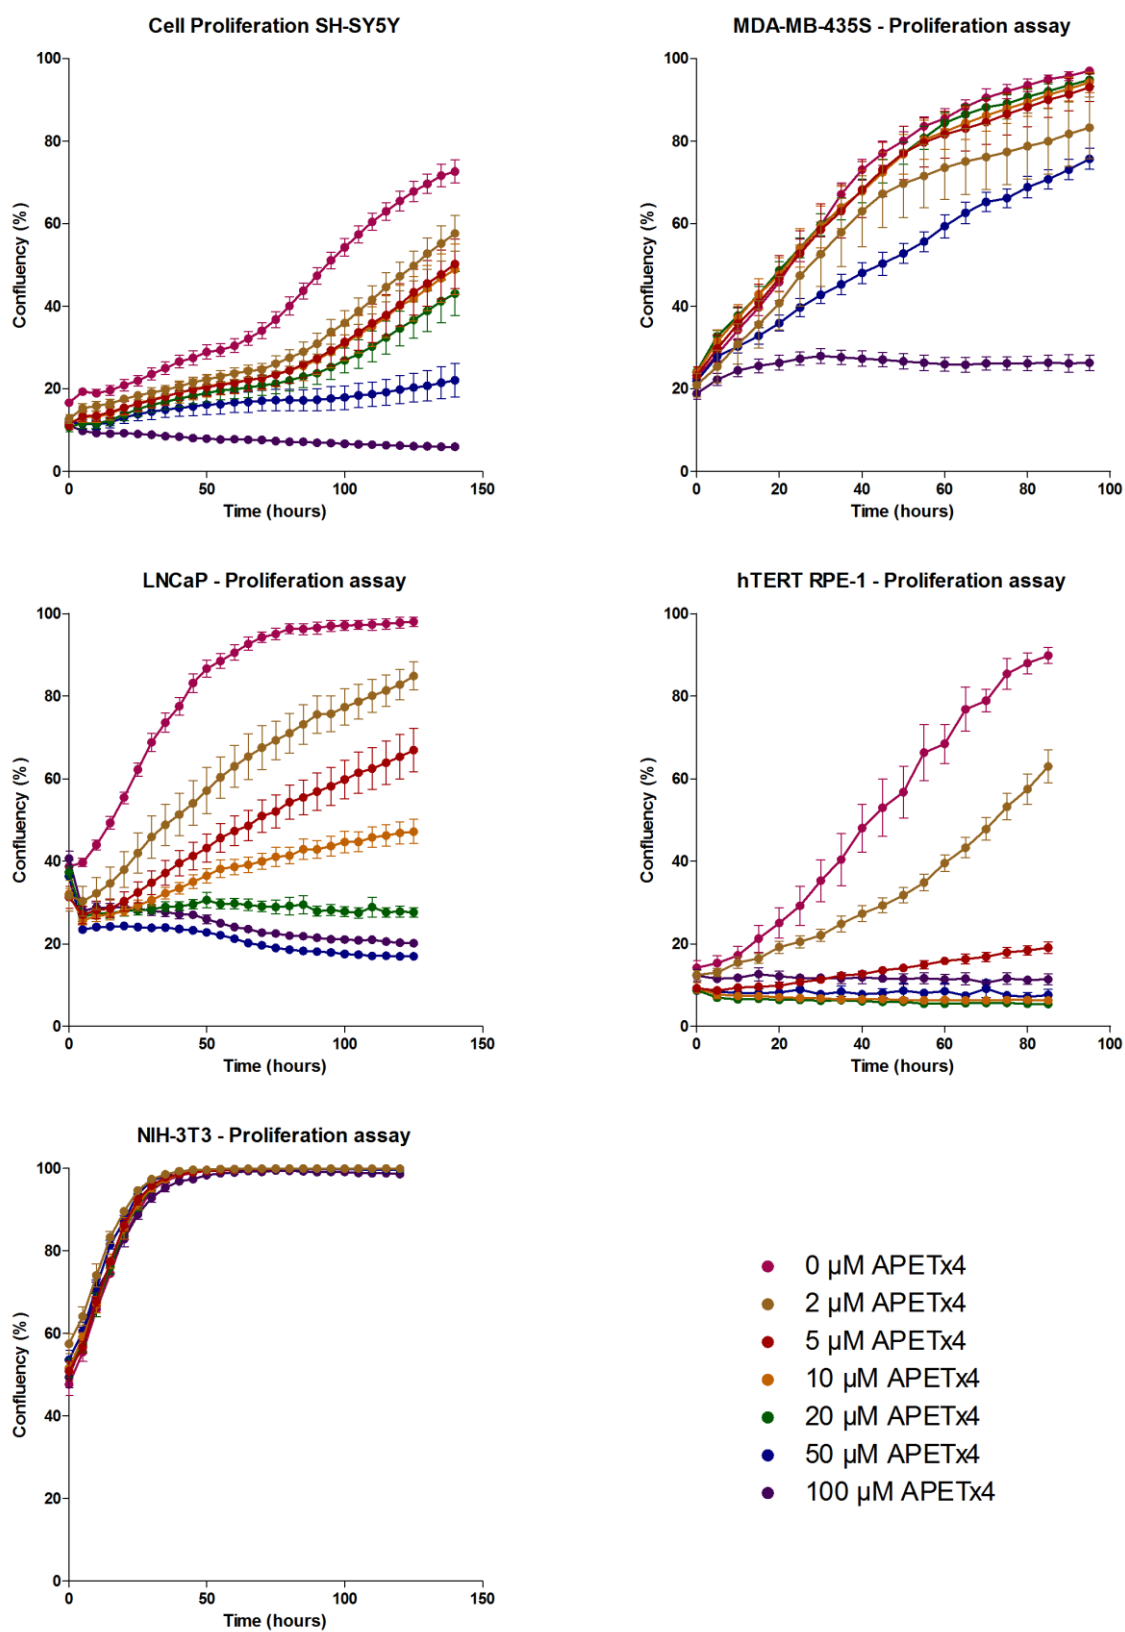

B

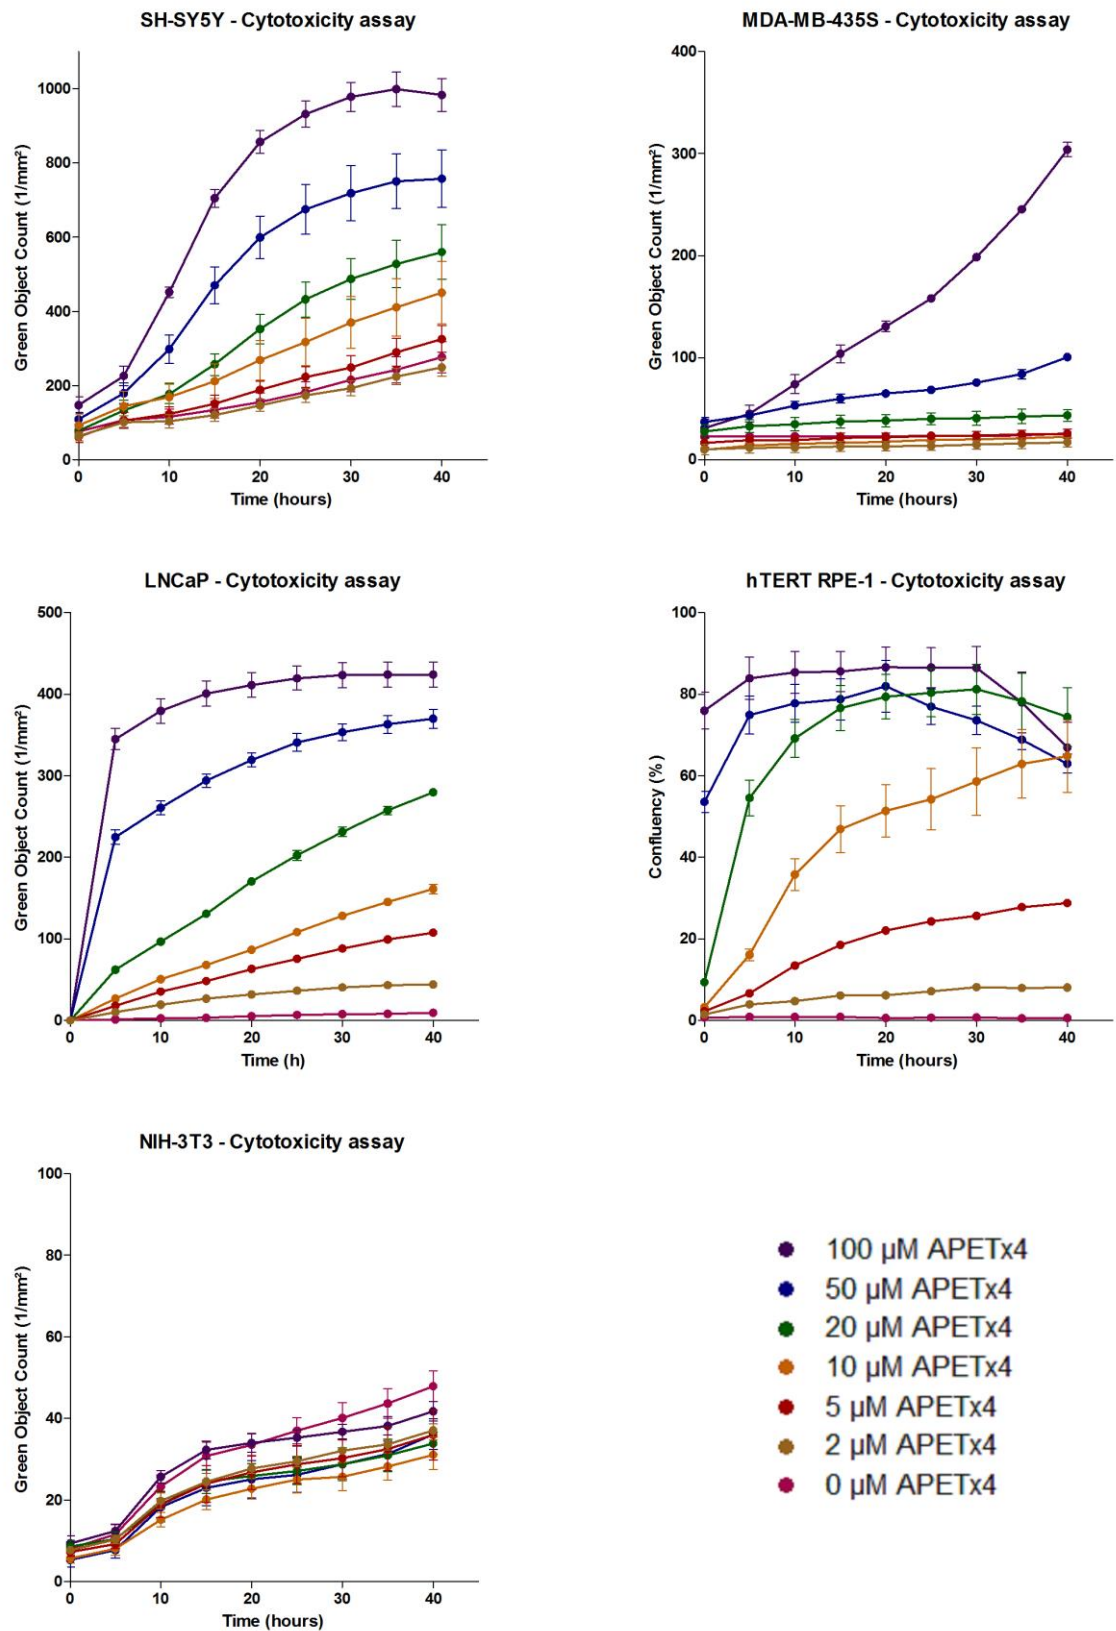

**Figure S5.** Investigation of the antiproliferative (A) and cytotoxic (B) effects of APETx4 on various cell lines.
