# Supplementary figures and images for: APETx4, a Novel Sea Anemone Toxin and a Modulator of the Cancer-Relevant Potassium Channel KV10.1
Source: MDPI journal article supplement (doi:10.3390/md15090287), 2017-09-13

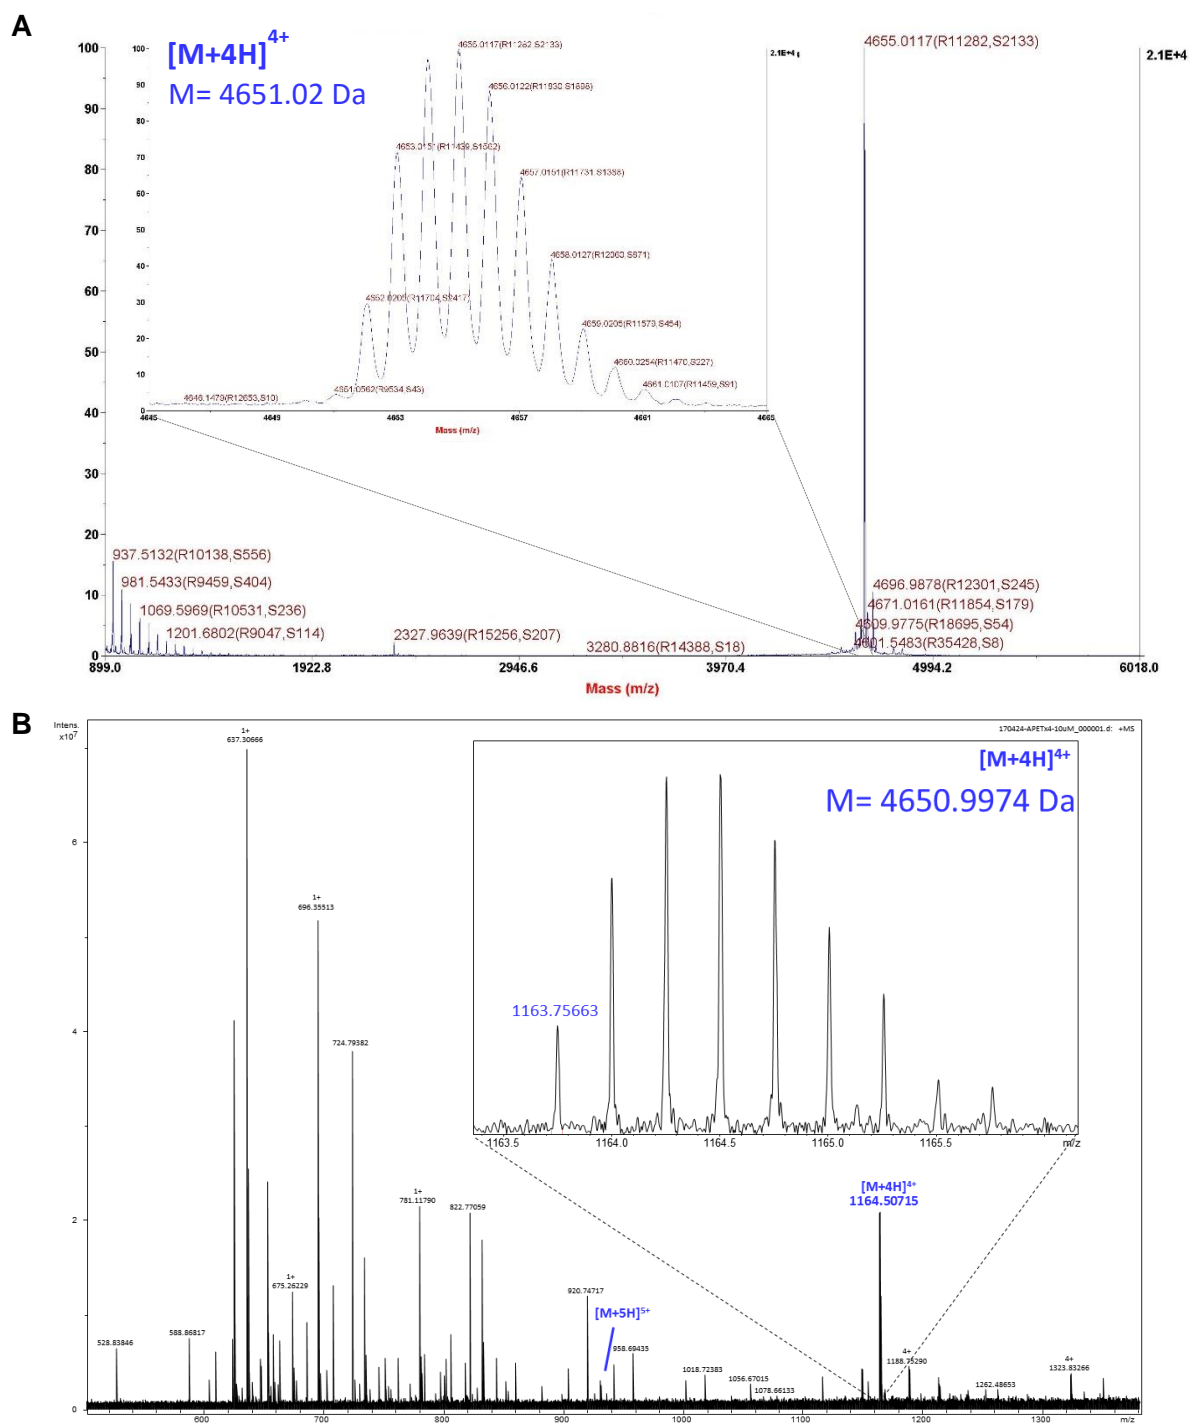

Supplement: s1 [file s1]
